# Supplementary material
Source: PubMed Central journal article supplement (PMC2928863)
Supplement: NIHMS223697-supplement-1.pdf [file NIHMS223697-supplement-1.pdf]

# **Dnmt3a regulates emotional behavior and spine plasticity in the nucleus accumbens.**

**Quincey LaPlant, Vincent Vialou, Herbert E Covington III, Dani Dumitriu, Jian Feng, Brandon Warren, Ian Maze, David M Dietz, Emily L Watts, Sergio D Iñiguez, Ja Wook Koo, Ezeikiel Mouzon, William Renthal, Fiona Hollis, Hui Wang, Michele A Noonan, Yanhua Ren, Amelia J Eisch, Carlos A Bolaños, Mohamed Kabbaj, Guanghua Xiao, Rachael L Neve, Yasmin L Hurd, Ronald S Oosting, Gouping Fan, John H Morrison, and Eric J Nestler**

## **Supplementary Online Information**

Supplementary Figures 1-4

Supplementary Tables 1 and 2

## Supplemental Figure S1

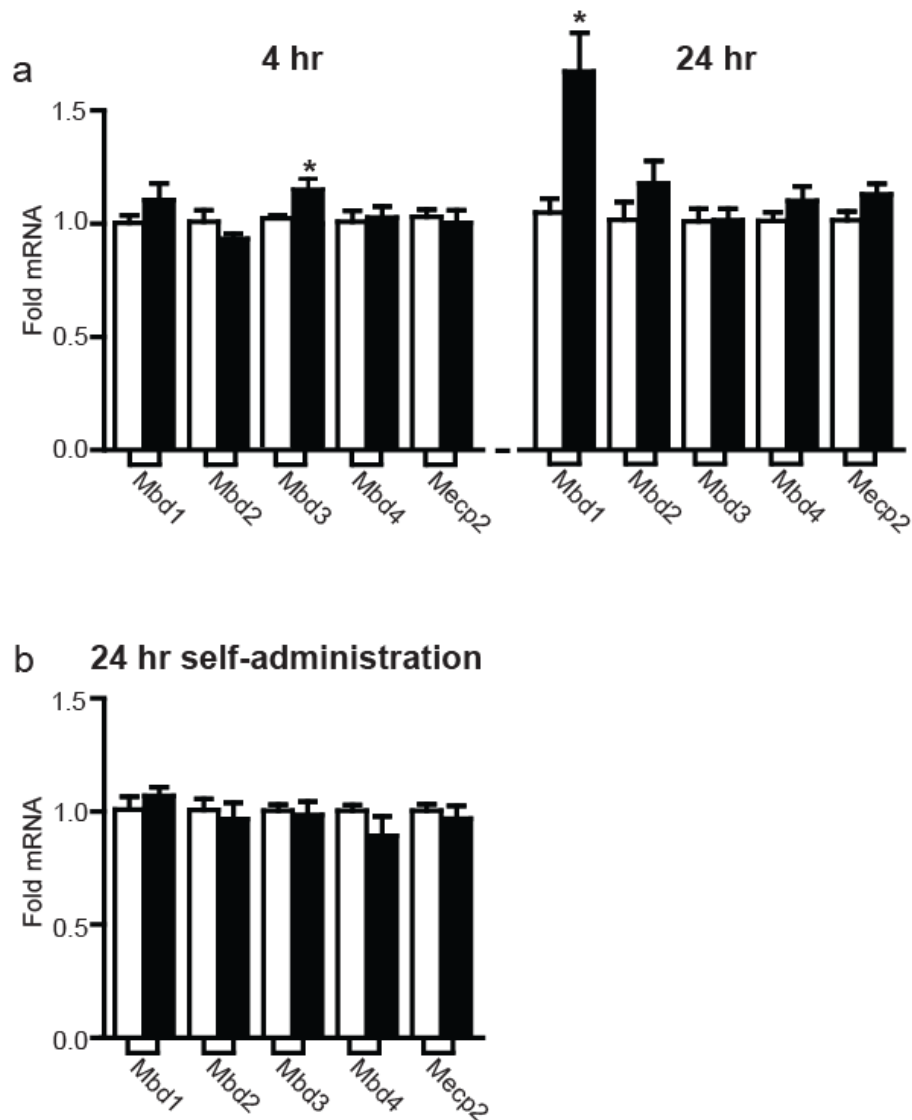

Supplemental Figure S1. **mRNA profiling of methyl-binding domain proteins (Mbd's) after chronic cocaine.** (a) qPCR analysis of NAc of chronic (7 days) cocaine treated mice indicated lack of regulation of Mbd's at 4 and 24 hrs, with the exception of a significant increase in Mbd3 at 4 hrs ( $*P < 0.05$ ,  $n = 7$ ) and Mbd1 at 24 hrs ( $*P < 0.05$ ,  $n = 16$ ). (b) However, Mbd1 and other Mbd's were unaltered in the NAc of self-administering rats examined 24 hours after the last cocaine dose.

Supplemental Figure S2

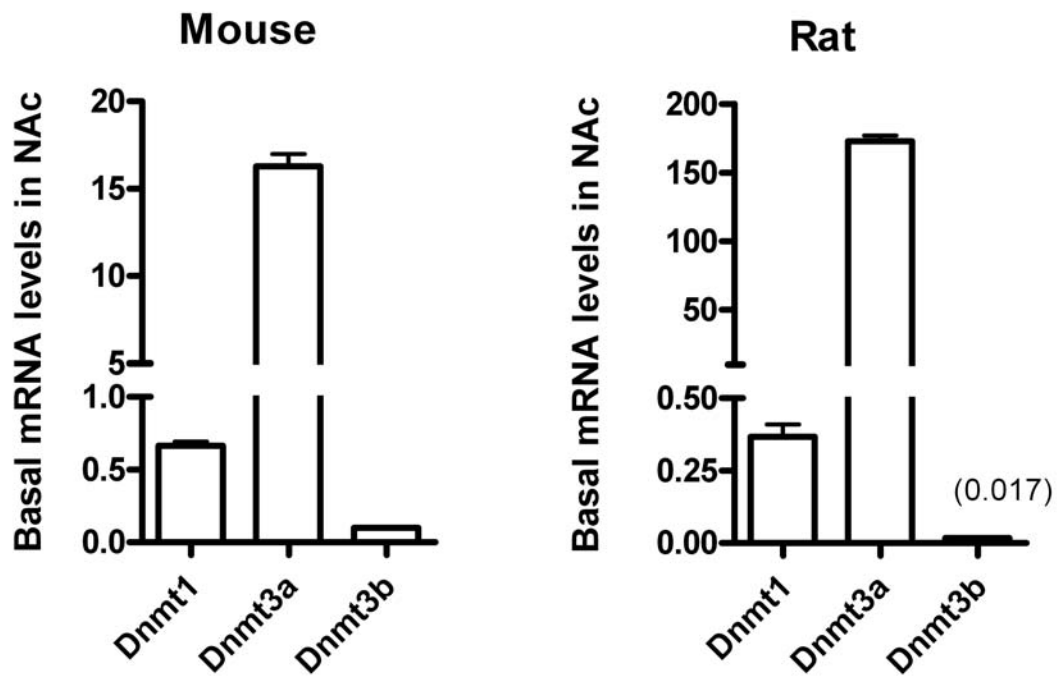

Supplemental Figure S2. **Relative Dnmt mRNA levels in NAc of mice and rats.** Data expressed as fold difference from the average level of all Dnmts from 20 control mice and 6 control rats. Dnmt3a shows the highest expression in the NAc. Dnmt expression was measure by qPCR.

Supplemental Figure S3

**a**

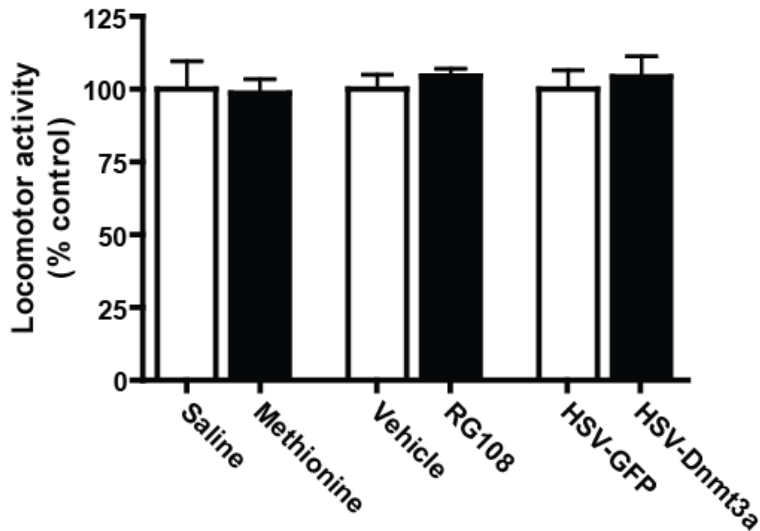

**b**

**Novel object recognition**

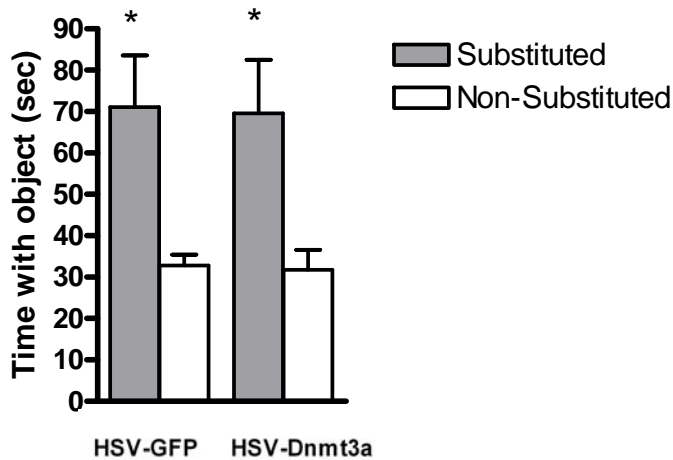

**c**

**Habituation to novel object**

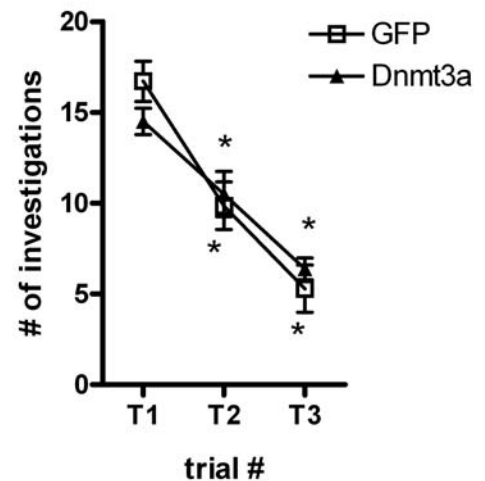

Supplemental Figure S3. **Experimental manipulation of DNA methylation does not alter locomotor activity or learning.** (a) Locomotor activity was measured by photobeam breaks in the CPP chamber during the first day of saline training. We found no significant locomotor effects of subcutaneous methionine, intra-NAc RG108, or intra-NAc HSV-Dnmt3a. (b) Mice given intra-NAc injections of HSV-GFP or HSV-Dnmt3a spend equally more time with a novel, substituted object compared to non-substituted objects. Mice were repeatedly (3 times, 5 min each) exposed to 3 objects with 3 min intervals between test sessions. On the final trial, one object is substituted with a novel object. (c) HSV-GFP and HSV-Dnmt3a treated mice become equally disinterested in a single novel object upon reexposure. Mice were repeatedly exposed to a single object for 5 min with 1 hr intervals between test sessions.

Supplemental Figure S4

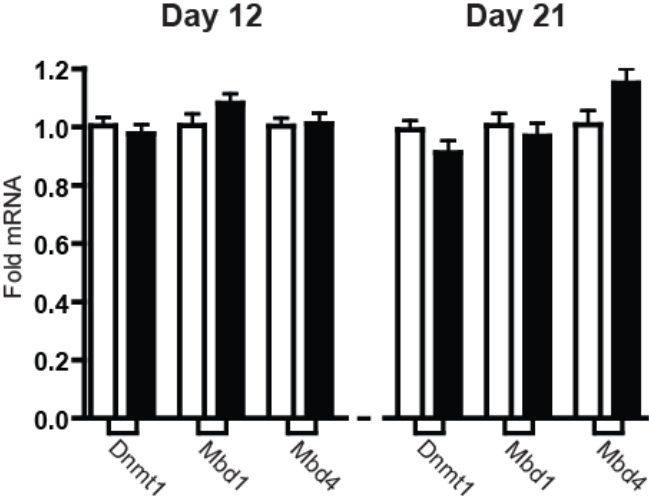

Supplemental Figure S4. **NAc mRNA profiling of Dnmt1, Mbd1, and Mbd4 following social defeat.** (a) qPCR analysis of NAc of mice subjected to chronic (10 days) social defeat taken 1 or 10 days after social interaction tests (Day 12 and 21) indicated lack of significant regulation of Dnmt1, Mbd1, and Mbd4 ( $P>0.05$ ).

## Supplemental Table 1

| Fig. 3 | Treatment  | Mouse         | Cocaine dose (mg/kg) | Pref score (sec) | SEM   |
|--------|------------|---------------|----------------------|------------------|-------|
| a      | METHIONINE | Wt            | 7.5                  | 63.48            | 51.67 |
|        | SALINE     | Wt            | 7.5                  | 257.92           | 61.35 |
| c      | RG108      | Wt            | 10                   | 304.58           | 26.05 |
|        | VEHICLE    | Wt            | 10                   | 85.17            | 39.78 |
|        | RG108      | Wt            | 15                   | 286.35           | 39.32 |
|        | VEHICLE    | Wt            | 15                   | 214.58           | 55.91 |
| g      | HSV-DNMT3a | Wt            | 7.5                  | 47.27            | 37.28 |
|        | HSV-GFP    | Wt            | 7.5                  | 170.17           | 71.69 |
|        | HSV-DNMT3a | Wt            | 10                   | 130.97           | 40.06 |
|        | HSV-GFP    | Wt            | 10                   | 246.85           | 35.14 |
| h      | AAV-Cre    | floxed-Dnmt3a | 7.5                  | 428.48           | 46.77 |
|        | AAV-GFP    | floxed-Dnmt3a | 7.5                  | 243.64           | 70.11 |
|        | AAV-Cre    | floxed-Dnmt1  | 7.5                  | 275.51           | 61.70 |
|        | AAV-GFP    | floxed-Dnmt1  | 7.5                  | 251.91           | 36.11 |

Pref, preference; wt, wildtype.

## Supplemental Table 2

| <b>Mouse Primers</b>        |                              |
|-----------------------------|------------------------------|
| Dnmt1 fwd                   | atcctgtgaaagagaacctgt        |
| Dnmt1 rev                   | ccgatgcatagggctctg           |
| Dnmt3a-1 fwd                | gaggaactgagacccac            |
| Dnmt3a-1 rev                | ctggaaggtgagtctggca          |
| Dnmt3b_fwd                  | gttaatgggaactcagtgaccaa      |
| Dnmt3b_rev                  | ctgctgtaattcagaaggct         |
| mbd2                        | GACGAGACCCTTCTGTCTGC         |
| mbd2_R                      | TGGACTCGCTCTTCCTGTTT         |
| mbd3                        | AGCCACAACCTGGCACGTTAC        |
| mbd3_R                      | GCTGGCGACTCTTATTCATCTTG      |
| mbd4                        | GGACAACAGAGTCCGTGGAG         |
| mbd4_R                      | ATCACCAGGTCCTTCCATCT         |
| mecp2                       | CAAACAGAGAGGAGCCTGTGGACAG    |
| mecp2_R                     | TTTATTTTCAGTTAATCGGGAAGCTTTG |
| <b>ChIP primers (mouse)</b> |                              |
| mPro_dnmt3a-500_fwd         | gcgttgtagagctcaagg           |
| mPro_dnmt3a-500_rev         | gaccggcaccctactgataa         |
| mPro_dnmt3a-2000_fwd        | CTAATCCCAGCTCGCTTTG          |
| mPro_dnmt3a-2000_rev        | ACATGCCAGGCTATTGGAAC         |

| <b>Rat Primers</b>    |                       |
|-----------------------|-----------------------|
| Rn_DNMT1_fwd          | CTCGTGGTCTCCTCCTCAG   |
| Rn_DNMT1_rev          | AGGGGAAGAGAGATGGCATT  |
| Rn_DNMT3a_fwd         | ACGCCAAGAAGGTCTGCT    |
| Rn_DNMT3a_rev         | CTTTGCCCTGCTTTATGGAG  |
| RN_DNMT3b_fwd         | CATAAGTCGAAGGTGCGTCGT |
| RN_DNMT3b_rev         | ACTTTTGTCTCGGCTCCT    |
| RN_mecp2_fwd          | GGACGCGAAAGCTAAACAG   |
| RN_mecp2_rev          | CTGGAGCTTTGGGAGATTTG  |
| RN_mbd4_fwd           | ATCTCCGTGCAAAAACCATC  |
| RN_mbd4_rev           | TGATTTTCCAAAGCCAGTC   |
| RN_mbd3_predicted_fwd | AACACTGCACTGCCTGTACG  |
| RN_mbd3_predicted_rev | ACAGCAGCGTCTCATCTGTG  |
| RN_mbd2_fwd           | ACCTGGGAAATGCTGTTGAC  |
| RN_mbd2_rev           | TTGCTTGAAAATGGATGCAG  |
| RN_mbd1_fwd           | GCCTGGTGAAAAGAAGACTGC |
| RN_mbd1_rev           | AGTTCTGTGGGCTCTGGATG  |
